1 **Heterozygous mutation of Sonic Hedgehog receptor (Ptch) drives cerebellar overgrowth**  
2 **and sex-specifically alters hippocampal and cortical layer structure, activity, and social**  
3 **behavior in female mice**

4  
5 Thomas W. Jackson, Gabriel A. Bendfeldt, Kelby A. Beam, Kylie D. Rock, Scott M. Belcher<sup>†</sup>

6  
7 Center for Human Health and the Environment

8 Department of Biological Sciences

9 North Carolina State University

10 127 David Clark Labs Campus Box 7617

11 Raleigh, North Carolina, USA 27695-7617

12

13 Email address: Thomas Jackson: [twjacks2@ncsu.edu](mailto:twjacks2@ncsu.edu)

14 Gabriel Bendfeldt: [gabendfe@ncsu.edu](mailto:gabendfe@ncsu.edu)

15 Kelby Beam: [kabeam2@ncsu.edu](mailto:kabeam2@ncsu.edu)

16 Kylie Rock: [kdrock@ncsu.edu](mailto:kdrock@ncsu.edu)

17 Scott Belcher: [smbelch2@ncsu.edu](mailto:smbelch2@ncsu.edu)

18

19 <sup>†</sup>**Corresponding author:** Scott M. Belcher, [smbelch2@ncsu.edu](mailto:smbelch2@ncsu.edu)

20

21 **Funding:** This work was supported in part by NIEHS training grant 5T32ES007046-38 and  
22 NIEHS grant P30ES025128.

23

24 **Conflicts:** The authors declare no conflicts of interest.

25

26

Abbreviations: ASD, Autism Spectrum Disorder; BCNS, Basal cell nevus syndrome; EGL, External germinal layer; ER $\beta$ , Estrogen receptor beta; GCPs, Granule cell precursors; HPE, holoprosencephaly; IGL, Internal granular layer; MB, medulloblastoma; ML, Molecular layer; mPFC, Medial prefrontal cortex; PL, Purkinje cell layer; Shh, Sonic hedgehog; ThN md and ThN vl, Thalamic mediodorsal and ventrolateral nuclei; VTA, Ventral tegmental area

27 **Abstract**

28       Sonic hedgehog (SHH) signaling is essential for the differentiation and migration of early  
29 stem cell populations during cerebellar development. Dysregulation of SHH-signaling can result  
30 in cerebellar overgrowth and the formation of the brain tumor medulloblastoma. Treatment for  
31 medulloblastoma is extremely aggressive and patients suffer life-long side effects including  
32 behavioral deficits. Considering that other behavioral disorders including autism spectrum  
33 disorders, holoprosencephaly, and basal cell nevus syndrome are known to present with  
34 cerebellar abnormalities, it is proposed that some behavioral abnormalities could be inherent to  
35 the medulloblastoma sequelae rather than treatment. Using a haploinsufficient SHH receptor  
36 knockout mouse model (*Ptch1*<sup>+/-</sup>), a partner preference task was used to explore activity, social  
37 behavior and neuroanatomical changes resulting from dysregulated SHH signaling. Compared  
38 to wild-type, *Ptch1*<sup>+/-</sup> females displayed increased activity by traveling a greater distance in both  
39 open-field and partner preference tasks. Social behavior was also sex-specifically modified in  
40 *Ptch1*<sup>+/-</sup> females that interacted more with both novel and familiar animals in the partner  
41 preference task compared to same-sex wild-type controls. Haploinsufficiency of PTCH resulted  
42 in cerebellar overgrowth in lobules IV/V and IX of both sexes, and female-specific decreases in  
43 hippocampal size and isocortical layer thickness. Taken together, neuroanatomical changes  
44 related to deficient SHH signaling may alter social behavior.

45

46

47 **Key words:** cerebellum, cortex, holoprosencephaly, hyperactivity, medial prefrontal cortex,  
48 medulloblastoma, sex differences.

49

## 51 **1. Introduction**

52 The cerebellum is a brain region important for coordinating control of voluntary motor  
53 movement, muscle tone, and balance (Altman and Bayer, 1997). Additionally, the cerebellum is  
54 involved in higher-order cognitive functions and related behaviors (Rogers et al., 2013a).  
55 Developmental cerebellar damage and abnormal cerebellar structure can result in impairment of  
56 motor function, cognition, and social reward behavior. Abnormalities of the prefrontal cortex,  
57 thalamus, and some cerebellar structures are a commonly observed feature of autism spectrum  
58 disorder (ASD). Emerging evidence supports the existence of behavioral circuits integrating the  
59 cerebellum, prefrontal cortex, and thalamus through dopaminergic signaling (Rogers et al.,  
60 2013a).

61 Normal cerebellar function depends on properly integrated actions of neurons residing in the  
62 three distinctive layers of the mature cerebellum: the molecular layer (ML), Purkinje cell layer  
63 (PL), and the internal granular layer (IGL). The ML is primarily comprised of synaptic interfaces  
64 between dendritic arbors of Purkinje cell neurons and the axonal parallel fibers of mature  
65 granule cells in the IGL. The PL is demarcated by a monolayer of Purkinje cell bodies that divide  
66 the ML from the IGL (Altman and Bayer, 1997). Granule cell precursors (GCPs) arise from a  
67 population of rhombic lip progenitors that migrate to the cerebellum and form the external  
68 germinal layer (EGL) where GCP proliferation continues until post-natal day 15 in mouse  
69 (Altman and Bayer, 1997). During the postnatal period of cerebellar development, the GCPs  
70 mitotically arrest, differentiate, and migrate through the ML and PL, and then reach their final  
71 destination in the IGL as mature granule cells. Development of the stereotypic structure of the  
72 cerebellum is a tightly regulated process that requires specific gradients of key morphogens  
73 (Martinez et al., 2013).

74 The Sonic Hedgehog (SHH) signaling pathway is necessary to induce differentiation and  
75 mitotic arrest of GCPs in the EGL, and subsequently acts to direct migration of the maturing  
76 granule cells to the IGL (Dahmane and Ruiz i Altaba, 1999). Those processes are mediated by

77 the morphogen SHH which binds to the Patched-1 (PTCH1) receptor expressed in Purkinje  
78 cells, GCPs, and cerebellar interneurons. Secretion of SHH from Purkinje cells is initiated  
79 around E17.5 in the mouse and peaks around postnatal day 6-8. The resulting SHH  
80 concentration gradient regulates differentiation of GCPs wherein lower concentrations of the  
81 morphogen allow continued proliferation. In the absence of the SHH ligand, PTCH1 inhibits  
82 Smoothed (SMO), a downstream G-protein coupled receptor. By contrast, SHH binding leads  
83 to disinhibition of SMO, resulting in increased activation of glioma-associated oncogene  
84 homolog (GLI) transcription factors. Uncontrolled disinhibition of SMO can result in failure of  
85 GCPs to differentiate, resulting in continued and excessive GCP proliferation, thereby  
86 overpopulating the IGL (Goodrich et al., 1997).

87 Mutations of genes encoding SHH pathway proteins are implicated in several human  
88 neurodevelopmental disorders (Hahn et al., 1996). Holoprosencephaly (HPE), most frequently  
89 caused by mutations of SHH, are the most common congenital forebrain abnormality in humans  
90 (Nanni et al., 1999; Solomon et al., 2010; Weiss et al., 2018a). Less commonly, mutations of  
91 PTCH1, the receptor for SHH, are also associated with HPE (Ming et al., 2002). Patients with  
92 HPE present with a wide array of phenotypes including forebrain malformations, craniofacial  
93 defects, and behavioral abnormalities including attention deficit hyperactivity disorder (ADHD)  
94 (Croen et al., 1996; Heussler et al., 2002).

95 Mutations of PTCH1 causing dysregulation of SHH are also associated with basal cell nevus  
96 syndrome (BCNS) (Gloude et al., 2016; Okamoto et al., 2014). Some BCNS patients develop  
97 skeletal anomalies, and approximately 3% develop the cerebellar brain cancer medulloblastoma  
98 (MB) (Lacombe et al., 1990). Molecular characterization of MB tumors has revealed that that 20-  
99 30% of MB patients have mutations in the SHH pathway (Northcott et al., 2012). The role of  
100 dysregulated SHH signaling in MB has been experimentally demonstrated using genetically  
101 modified strains of mice containing constitutively active Smo alleles, or knockout mutations of  
102 Ptch, that result in aberrant GLI1 transcriptional activity that gives rise to MB (Dey et al., 2012;

103 Goodrich et al., 1997; Grammel et al., 2012; Hallahan et al., 2004; Lee et al., 2007; Schüller et  
104 al., 2008; Uziel, 2005; Wetmore et al., 2001). *Ptch1*-knockout mice, initially developed to  
105 evaluate the role of the SHH-PTCH signaling pathway in BCNS, have been used widely to study  
106 MB (Goodrich et al., 1997; Nitzki et al., 2012). Whereas homozygous knockout of the PTCH1  
107 receptor gene (*Ptch1*<sup>-/-</sup>) is embryonically lethal due to failures of neural tube closure,  
108 haploinsufficient *Ptch* heterozygous mice (*Ptch1*<sup>+/-</sup>) are viable but have increased SMO and  
109 GLI1 activity resulting from decreased PTCH1 protein expression (Goodrich et al., 1997).  
110 Phenotypically, that dysregulation of GLI1 transcriptional programming results in increased GCP  
111 proliferation, aberrant neuronal migration, and MB in 10-20% of *Ptch1*<sup>+/-</sup> adult mice (Zurawel et  
112 al., 2000). In addition to cerebellar dysregulation and MB tumorigenesis, altered hippocampal  
113 structures have been reported in male *Ptch1*<sup>+/-</sup> adult mice (Antonelli et al., 2018). A finding  
114 consistent with SHH signaling also having potential roles in neurogenesis of hippocampal  
115 progenitors hippocampal (Yao et al., 2016).

116 As was observed in experimental mouse models, mutations in humans causing unregulated  
117 activation of SHH-signaling, either via gain of SMO or loss of PTCH function, also result in MB.  
118 Medulloblastoma are one of the most common solid tumors of childhood, accounting for  
119 approximately 20% of all pediatric tumors. There are noted sex differences in some molecular  
120 subgroups of MB, with overall incidence showing a 1.5:1 male to female sex ratio; however, the  
121 sex ratio differs by population and depends on the etiology of the tumor (Northcott et al., 2012;  
122 Sun et al., 2015). The WNT and SHH subgroups of MB present with a 1:1 sex ratio (Northcott et  
123 al., 2012). Estrogen receptor  $\beta$  (ER $\beta$ ) is expressed in maturing GCPs and MB tumor cells and  
124 can modify MB growth and progression (Belcher, 2008; Jakab et al., 2001). Increased estrogen  
125 receptor signaling during cerebellar development and MB progression results in upregulation of  
126 cytoprotective ER $\beta$ -dependent insulin-like growth factor signaling that impacts GCP maturation

127 and migration, and can increase MB tumor growth rate (Belcher, 2008; Cookman and Belcher,  
128 2015).

129 Clinical treatment for MB is extremely aggressive and associated with severe life-long side  
130 effects in survivors. Typical treatment for MB involves primary tumor resection followed by  
131 radiation therapy and cytotoxic chemotherapy. Neurological complications including impaired  
132 attention and processing speed, learning and memory, language, visual perception, and  
133 executive functions occur in nearly all MB survivors and cause difficulties with social functions  
134 that can greatly decrease quality of life (Ribi et al., 2005). While associated with treatment,  
135 these behavioral defects and cognitive deficits resemble the hallmark behavioral symptoms  
136 associated with HPE and BCNS. The neurological deficits in MB survivors have been solely  
137 attributed to therapeutic side effects, but some component of the behavioral deficits in patients  
138 with MB may result from IGL overgrowth inherent to the SHH MB sequelae. To determine  
139 whether heterozygous mutation of *Ptch1* alone may influence behavior, male and female  
140 *Ptch1*<sup>+/-</sup> mice and their wildtype littermates were assayed using several behavioral tasks.  
141 Following behavioral analysis, brains from these *Ptch1*<sup>+/-</sup> mice were examined histologically to  
142 identify neuroanatomical alterations in structures potentially related to cerebello-cortical circuitry  
143 that could influence social behavior.

## 145 2. Experimental Procedures

146

### 147 2.1. Animal Husbandry

148 All animal procedures and reporting adhere to the ARRIVE guidelines (Supplemental data)  
149 and were performed in accordance with protocols approved by the North Carolina State  
150 University (NCSU) Institutional Animal Care and Use Committee following recommendations of  
151 the Panel on Euthanasia of the American Veterinary Medical Association. Study animals were  
152 housed on a 12:12 light cycle at 25°C and 45%-60% average relative humidity in an AAALAC  
153 accredited animal facility. Mice were housed in thoroughly washed polysulfone cages with  
154 woodchip bedding and pulped virgin cotton fiber nestlets (Ancare, Bellmore, NY). Soy-free  
155 Teklad 2020X diet (Envigo, Madison, WI) was supplied *ad libitum*. Sterile drinking water  
156 produced from a reverse osmosis water purification system (Millipore Rios with ELIX  
157 UV/Progard 2, Billerica, MA) was supplied *ad libitum* from glass water bottles with rubber  
158 stoppers and metal sippers.

159 Strains C57Bl6/J and STOCK *Ptch1<sup>tm1Mps</sup>/J* were obtained from Jackson Laboratory (Bar  
160 Harbor, ME). Breeding was performed in-house to propagate both lines. Heterozygote *Ptch1*  
161 mutants and wildtype littermates were used for experimental procedures. Adult mice that  
162 presented with MB tumors were excluded from analyses. Genomic DNA was isolated from a 5  
163 mm tail biopsy using a rapid digestion method where 95 µl of lysis buffer reagent (Viagen  
164 Biotech, Los Angeles, CA; Cat: 102-T) and 5 µl of Proteinase K (20 mg/ml; Viagen Biotech, Los  
165 Angeles, CA; Cat: 501-PK) were added to the biopsy sample, incubated for 4 hours at 55°C and  
166 45 minutes at 85°C. Isolated DNA was used to identify offspring genotype following  
167 recommended genotyping protocol (Jax, Bar Harbor, ME) and analyzed by agarose gel  
168 electrophoresis on 1.5% gels. Heterozygotes were identified by the presence of both wild-type  
169 (200 base pair) and mutant (479 base pair) specific PCR products. Mice were weaned on  
170 postnatal day 21 (PND 21), assigned a coded identification number (Supplemental Table 1),

171 and identified by ear notching. No notable pathology differences or morbidity were detected in  
172 *Ptch1*<sup>+/-</sup> mice aside from development of MB in a subset of animals (18% of female; 9% of male)  
173 that were excluded from analyses due to death or ataxia associated with MB-like tumors  
174 detected at necropsy.

## 175 2.2. Behavior Tests and Analysis

176 All behavioral testing was conducted in a dedicated behavioral testing room at the NCSU  
177 Biological Resources Facility. Mice were transported in their home cage to the testing room on a  
178 covered rolling cart and tested after a minimum 30-minute acclimation period. Animals were  
179 tested in the last three hours of the light cycle. Both novel social and partner preference tasks  
180 used a blue, opaque arena (58 cm x 58 cm) with four high walls (43 cm). All arenas were in the  
181 same room with two conspecific animals run concurrently. Each animal was gently placed in the  
182 middle of the arena and given 30 minutes to explore, during which time they were not disturbed.  
183 No observer was present in the room. Behavioral data was digitally recorded (Handycam HDR-  
184 CX190, Sony, Tokyo) and automatically scored using TopScan behavioral analysis software  
185 (CleverSys, Inc, Reston, VA). For analysis, the floor of the open field arena was digitally divided  
186 into a 3x3 square grid, creating 9 squares in total of equal size. The middle square was  
187 designated as the center. All data was collected and analyzed by observers blinded to  
188 experimental group, and were validated by hand-scoring using a stop-watch.

### 189 2.2.1. Novel Social Task

190 Adult mice (wild-type: mean age: PND96, range: PND75-114; *Ptch1*<sup>+/-</sup> mean age:  
191 PND99; range: PND75-119) were tested for 30 minutes in the novel social arena as described  
192 previously (Winslow, 2003). A naïve same sex and younger/smaller, unrelated wild-type  
193 stimulus animal was caged in a randomly selected corner of the arena. The first five minutes of  
194 the trial were excluded from analyses to account for increased exploratory behavior that is  
195 commonly observed during entry into a novel environment (Bailey and Crawley, 2009).  
196 Maximum velocity and distance traveled were used to examine motor function decrements.



197 Center crosses, time spent along the wall, number of interactions, and time spent interacting  
198 were used to assess sociability. Latency to enter the stimulus animal's area, frequency of  
199 movement within areas of the arena, number of contact bouts, and duration within stimulus  
200 animal's area and exploratory areas were analyzed.

### 201 2.2.2. *Partner Preference Task*

202 Twenty-four hours after the novel social testing, animals were tested with two same-sex  
203 conspecific wild-type animals to examine the effects of *Ptch1* haploinsufficiency on social  
204 interaction and formation of partner preference (Winslow, 2003). Briefly, the same stimulus  
205 animal used for the novel social task was caged in one corner as a now-familiar animal, while a  
206 novel unfamiliar mouse was caged in the opposite corner. Latency to enter each stimulus  
207 animal's area, frequency of movement within areas of the arena, number of contact bouts with  
208 each animal, and duration within stimulus animal's area and exploratory areas were analyzed.

### 209 2.2.3 *Olfactory Task*

210 The ability of a subset of experimental animals to respond to a desirable olfactory cue was  
211 evaluated using an established protocol to assess intact recognition of a food-reward smell  
212 (Yang and Crawley, 2009). Briefly, animals were fasted for 12 hours overnight with *ad libitum*  
213 access to water and then placed into a clean cage containing a single previously buried Apple  
214 Jack (Kellogg, Battle Creek); the time required to locate and pick up the Apple Jack was  
215 measured using a stopwatch. An a priori maximum latency threshold of >900 seconds for food-  
216 treat discovery was defined as indicative of a decrement responsiveness (Yang and Crawley,  
217 2009).

### 218 2.3. *Neuroanatomy and Histology*

219 Following completion of behavioral testing mice were euthanized by CO<sub>2</sub> asphyxiation.  
220 Brains were isolated by dissection, rapidly frozen on powdered dry ice, and stored at -80°C until  
221 prepared for analysis. Brains and cerebella were separately embedded in OCT (Fisher  
222 Scientific, Hampton, NH) and mounted directly onto cryostat chucks for cryosectioning. Serial

223 mid-sagittal cryosections (20  $\mu\text{m}$ ) from the central vermis of each cerebellum and serial coronal  
224 cryosections (40  $\mu\text{m}$ ) of the brain were sectioned using a Leica Cryostat (Leica CM1900,  
225 Nussloch, Germany), mounted onto Superfrost plus slides (Fisher Scientific, Pittsburgh, PA),  
226 and stored at  $-80^{\circ}\text{C}$  until histological processing.

227 For Nissl staining, sections were brought to room temperature and immersed in xylene  
228 (Fisher Scientific, Hampton, NH; Cat: X5-500) for 30 minutes, 100% ethanol (Fisher Scientific,  
229 Hampton, NH; Cat: 22-032-601) for 3 minutes, 95% ethanol for 3 minutes, and Milli-Q water for  
230 2 minutes before staining with 0.2% Cresyl Violet (Fisher Scientific, Hampton, NH; Cat:  
231 AC405760025) for 12 minutes. Sections were then dehydrated by immersing in 95% ethanol for  
232 30 seconds, 100% ethanol for 30 seconds, and 3 washes in Xylene for 1 minute each. Slides  
233 were then cover-slipped using Permount (Electron Microscopy Sciences, Hatfield, PA; Cat:  
234 17986-01).

235 Stained sections were examined by an investigator blind to genotype and sex on a Nikon  
236 Eclipse 80i microscope using a DSFi1 CCD camera controlled with Digital Sight software  
237 (Nikon; Melville, NY). Digital bright field micrographs of sections from the most medial 100-  
238 microns of the vermis were collected using the 2x objective for analysis of cerebellar  
239 morphology. For IGL area quantification, the most medial 20-micron section was defined using  
240 consecutive serial sections and identified by using the following criteria: the 4<sup>th</sup> ventricle  
241 protrudes towards lobule IX, deep cerebellar nuclei (fastigial nucleus, interposed nucleus, and  
242 dentate nucleus) are absent, and lobule X had a distinct nodulus. Coronal 40-micron  
243 cryosections of the cortex were assessed for gross morphometric differences at each of the  
244 following three landmarks. The first region was identified using the following criteria: ammon's  
245 horn extends through the section, supramammillary and medial mammillary nuclei were present,  
246 and nucleus of Darkschewitsch was present (Bregma -2.88). The second region was identified  
247 using the following criteria: the 3<sup>rd</sup> ventricle extends through section and arcuate nucleus was

248 present; (Bregma -1.755). The third region was identified using the following criteria: CA3  
249 appears circular, lateral ventricle is rhomboid with a tail (Bregma -1.06). Digital bright field  
250 micrographs were collected using 1x and 2x Nikon objectives (Nikon, Tokyo, Japan; Cat:  
251 MRL00012 and MRL00022) and compared to a standardized atlas to identify gross  
252 morphometric differences. (Allen Institute for Brain Science, 2011, Seattle, WA). Areas of  
253 interest were measured using Nikon NIS Elements AR 3.2 with final figures of representative  
254 sections generated using Adobe Photoshop (San Jose, CA).

#### 255 *2.4. Statistical Analysis*

256 Data analysis was performed using a 2-way (sex, genotype) or 3-way (sex, genotype,  
257 novelty/sociality/5-min period) multivariate analysis of variance as indicated. For analysis of  
258 cerebellar lobules and cortical layers, data analysis was performed using repeated measure  
259 ANOVA. Litter was included as a covariate and adjusted for if necessary. All animal  
260 assignments and litter information are provided (Supplemental Table 1). If overall effects were  
261 significant, a Fisher's least significant differences post hoc test was performed to evaluate pair-  
262 wise differences. For neuroanatomical endpoints, confounds related to possible litter effects  
263 were avoided by limiting analysis to one animal of a given sex from each litter. A minimal level  
264 of statistical significance for differences in values among or between groups was considered  $p <$   
265  $.05$ . Percentage data was arcsine transformed (arcsine of the square root of the percentage)  
266 prior to statistical analysis. All data were analyzed using GraphPad Prism v8 (GraphPad; La  
267 Jolla, CA) or SPSS v26 (IBM, Armonk, NY).

### 268 3. Results

#### 269 3.1. General locomotor function and exploratory behavior

270 Since the cerebellum is critical in motor function, general locomotor function was assessed  
271 during the open-field novel social task to evaluate whether *Ptch1<sup>+/-</sup>* mice exhibit motor deficits.  
272 Multivariate analysis of variance (MANOVA) showed no deficits in maximum velocity over the  
273 30-minute trial ( $F(1, 68) = .14, p = .71$ ) (Figure 1A). Multivariate analysis of variance showed an  
274 interaction of sex and genotype on total distance traveled ( $F(1, 54) = 4.52, p = .04, \eta^2 = .55$ ).  
275 Post hoc analysis using Fisher's LSD indicated that total distance traveled by *Ptch1<sup>+/-</sup>* females  
276 only was increased compared to wild-type (females:  $p = .009$ ; males:  $p = .84$ ) (Figure 1B).  
277 Repeated measures 3-way MANOVA with sex (male, female) as the within-subjects factor, 5-  
278 min period (1-6), and genotype (wild-type, *Ptch1<sup>+/-</sup>*) as the between-subjects factors revealed a  
279 significant interaction of sex and genotype on distance traveled across 5-minute periods ( $F(1,$   
280  $53) = 4.28, p = .04, \eta^2 = .18$ ). A follow-up repeated measures 2-way MANOVA within sex  
281 revealed that females only were significantly different in distance traveled across 5-minute  
282 periods (females:  $p = .002$ ; male:  $p = .47$ ) (Figure 1C and 1D).

283 During the open-field novel social task, time spent along the wall and number of center  
284 crosses over the 30-minute trial were assessed to examine exploratory behavior. Multivariate  
285 analysis of variance showed no differences in time spent along the wall ( $F(1, 68) = .79, p = .38$ )  
286 (Supplemental Figure 1). Consistent with increased distance traveled, MANOVA found a  
287 significant effect of genotype on center crosses ( $F(1, 68) = 8.47, p = .006, \eta^2 = .81$ )  
288 (Supplemental Figure 1). Post hoc analysis using Fisher's LSD indicated a significant increase  
289 in number of center crosses in *Ptch1<sup>+/-</sup>* females only (females:  $p = .02$ ; males:  $p = .55$ ). In the  
290 novel social task, MANOVA found no differences in the number of interactions ( $F(1, 68) = 1.98,$   
291  $p = .16$ ) or the duration of those interactions ( $F(1, 68) = 0.20, p = .66$ ) with the novel animal.

292

293 3.2. *Social behavior*

294 To assess the effects of *Ptch1* mutation on social behavior, a partner preference task was  
295 used. As in the novel social task, MANOVA of the partner preference task showed no  
296 differences in maximum velocity ( $F(1, 57) = .59, p = .45$ ) (Figure 1A) nor time spent along the  
297 wall ( $F(1, 57) = 3.72, p = .06$ ) (Supplemental Figure 2). In the partner preference task, MANOVA  
298 again detected a significant interaction between sex and genotype on total distance traveled  
299 ( $F(1, 56) = 4.12, p = .048, \eta^2 = .51$ ). Post hoc analysis using Fisher's LSD identified a significant  
300 increase in total distance traveled was again in *Ptch1*<sup>+/-</sup> females only (females:  $p = .002$ ; males:  
301  $p = .71$ ). Multivariate analysis of variance again showed a main effect of genotype on center  
302 crosses consistent with increased distance traveled ( $F(1, 57) = 5.99, p = .02, \eta^2 = .67$ )  
303 (Supplemental Figure 2). Post hoc analysis using Fisher's LSD identified a significant increase  
304 in total distance traveled was again in *Ptch1*<sup>+/-</sup> females only (females:  $p = .02$ ; males:  $p = .22$ ).

305 A 3-way MANOVA with sex (male, female) as the within-subjects factor, and novelty (novel,  
306 familiar) and genotype (wild-type, *Ptch1*<sup>+/-</sup>) as the between-subjects factors, revealed an  
307 interaction between sex and genotype on the duration of interactions during the partner  
308 preference task ( $F(1, 110) = 8.59, p = .005, \eta^2 = .82$ ). Post hoc analysis using Fisher's LSD  
309 revealed that *Ptch1*<sup>+/-</sup> females only show increased time spent interacting with both novel  
310 (females:  $p = .047$ ; males:  $p = .72$ ) and familiar animals (females:  $p = .03$ ; males:  $p = .93$ )  
311 (Figure 2A). All other main effects were non-significant and not relevant to the tested  
312 hypotheses.

313 A 3-way MANOVA with sex (male, female) as the within-subjects factor and novelty (novel,  
314 familiar) and genotype (wild-type, *Ptch1*<sup>+/-</sup>) as the between-subjects factors revealed an  
315 interaction between sex and genotype on the number of interactions during partner preference  
316 task ( $F(1, 111) = 14.52, p = .0002, \eta^2 = .22$ ). That interaction was qualified by an interaction  
317 between novelty, sex, and genotype ( $F(1, 111) = 7.698, p = .007, \eta^2 = .11$ ). Post hoc analysis  
318 using Fisher's LSD revealed that *Ptch1*<sup>+/-</sup> females only show an increase in the number of

319 interactions with the novel animal (females:  $p < .0001$ ; males:  $p = .10$ ) (Figure 2B). All other  
320 main effects were non-significant and not relevant to the tested hypotheses.

321 A 3-way ANOVA with sex (male, female) as the within-subjects factor, and sociality (nose-  
322 nose, nose-tail) and genotype (wild-type, *Ptch1<sup>+/-</sup>*) as the between-subjects factors, revealed a  
323 significant interaction between sex, sociality, and genotype on the percentage of nose-tail bouts  
324 ( $F(1, 136) = 7.24$ ,  $p = .01$ ,  $\eta^2 = .75$ ). Post hoc analysis using Fisher's LSD revealed that *Ptch1<sup>+/-</sup>*  
325 females only show increased nose-tail bouts relative to wild-type (females:  $p = .0003$ ; males:  $p =$   
326  $.81$ ) (Figure 2C). All other main effects were non-significant and not relevant to the tested  
327 hypotheses.

### 328 3.3. Olfaction

329 The ability of test animals to respond to a desirable food-treat was evaluated to ensure that  
330 modifications in social behaviors were not influenced by unanticipated decrements in ability to  
331 identify and respond to olfactory cues or a lack of motivation. A subset of wild-type (female:  $n=7$ ;  
332 male:  $n=5$ ) and *Ptch1<sup>+/-</sup>* (female:  $n=3$ ; male:  $n=2$ ) were evaluated using an established protocol  
333 to assess intact recognition of smell wherein a latency greater than 15 minutes (900 seconds) is  
334 considered indicative of a decrement in smell (Yang and Crawley, 2009). There were no test  
335 failures with all animals tested rapidly discovering the olfactory stimulus in less than the allotted  
336 task time. The maximum time for any animal to complete the task was less than 4 minutes (231  
337 seconds).

### 338 3.4. Cerebellar and cortical structures

339 In contrast to the stereotypic morphology of the cerebellum observed in both male and  
340 female wild-type mice (Figure 3A and 3C), granule cell overgrowth with localized thickening of  
341 the IGL was commonly observed in the *Ptch1<sup>+/-</sup>* mutants (Figure 3B and 3D; asterisks). Ectopic  
342 granule cells were also observed in 43% (6/14) of *Ptch1<sup>+/-</sup>* females (Figure 3B; arrow) and 45%  
343 (5/11) of *Ptch1<sup>+/-</sup>* males, compared to vermis of the cerebellum from wild-type mice (Figure 3A,

344 female; 3C, male) where ectopic granule cells were not observed in either sex (female: n=9;  
345 male: n=9).

346 The extent of granule cell overgrowth was assessed by quantitative comparison of IGL  
347 area in the cerebellar vermis of wildtype and *Ptch1*<sup>+/-</sup> mutants. Repeated measures analysis of  
348 variance showed a significant effect of genotype on total IGL area ( $F(1, 31) = 7.349$ ,  $p = .01$ ,  $\eta^2$   
349  $= .99$ ). Post hoc analysis for total IGL area using Fisher's LSD was not statistically significant in  
350 either sex (Figure 3B; female:  $p = .06$ ; male:  $p = .07$ ), but differences in the area of individual  
351 lobules of the cerebellum appeared to drive the detected effect of genotype (Table 1; Figure  
352 3E). Repeated measures ANOVA for the IGL area of individual lobules detected a significant  
353 main effect of genotype on IGL area ( $F(1, 31) = 13.7$ ,  $p = .002$ ,  $\eta^2 = .98$ ) with post hoc analysis  
354 using Fisher's LSD demonstrating specific effects in both sexes on lobules IV/V (females:  $p =$   
355  $.02$ ; males:  $p = .001$ ), VII (females:  $p = .04$ ; males:  $p = .009$ ), VIII (females:  $p = .046$ ; males:  $p =$   
356  $.008$ ), and IX (females:  $p = .001$ ; males:  $p = .01$ ) and in males only in lobule VI (females:  $p =$   
357  $.82$ ; males:  $p = .001$ ) (Figure 3E). Overt loss of Purkinje cells or differences in the width of the  
358 Purkinje cell monolayer were not observed in the cerebellum of either sex.

359 Outside of the cerebellum, malignancy or gross morphological changes in the brains of the  
360 *Ptch1*<sup>+/-</sup> mutants were not observed. To evaluate potential structural differences in the extra-  
361 cerebellar brain regions of *Ptch1*<sup>+/-</sup> mutants, hippocampal and cortical structures implicated in  
362 playing a functional role in cerebellar functions and related behaviors were compared. Analysis  
363 of variance of the length of ammon's horn (Figure 4A-4C) showed a statistically significant  
364 interaction of genotype and sex ( $F(1, 14) = 4.62$ ,  $p = .0495$ ,  $\eta^2 = .39$ ). Post hoc analysis using  
365 Fisher's LSD indicated that this hippocampal structure in *Ptch1*<sup>+/-</sup> females only was significantly  
366 smaller than wildtype (females:  $p = .006$ ; males:  $p = .75$ ) (Figure 4D). Analysis of variance of the  
367 dentate gyrus length showed a statistically significant interaction of genotype and sex ( $F(1, 14) =$   
368  $7.16$ ,  $p = .02$ ,  $\eta^2 = .40$ ). Post hoc analysis using Fisher's LSD indicated that the dentate gyrus  
369 of *Ptch1*<sup>+/-</sup> females only was similarly reduced in size compared to wild-type (females:  $p = .006$ ;

370 males:  $p = .71$ ) (Figure 4D). Lateral ventricle area was measured because of noted differences  
371 of the lateral ventricle in BCNS syndrome and ASD (Shiohama et al., 2017; Turner et al., 2016).  
372 Analysis of variance showed no differences in lateral ventricle area ( $F(1, 11) = 0.93, p = .35$ ).

373 In the cortex, a main effect of genotype on overall cortical layer length ( $F(1, 14) = 6.24, p =$   
374  $.03, \eta^2 = .80$ ) was detected, however post hoc analysis of total cortical layer length (Figure 4A)  
375 was not statistically significant for either sex (female:  $p = .10$ ; male:  $p = .10$ ). Analysis of  
376 variance of overall cortical layer width showed no effect from sex or genotype ( $F(1, 14) = 1.65, p$   
377  $= .22$ ). However, increased cellularity in all cortical layers was observed in *Ptch1*<sup>+/-</sup> females  
378 (Figures 4B; 4C). Repeated measures ANOVA found a significant effect of genotype on the  
379 width of individual cortical layers ( $F(1, 25) = 8.2, p = .02, \eta^2 = .48$ ). Post hoc analysis using  
380 Fisher's LSD detected specific effects in lobule VI in females only (females:  $p = .007$ ; males:  $p =$   
381  $.35$ ) (Figure 4E). No effect of sex or genotype was detected in either sex in cortical layers I  
382 (females:  $p = .22$ ; males:  $p = .65$ ), II/III/IV (females:  $p = .09$ ; males:  $p = .70$ ) or V (females:  $p$   
383  $= .14$ ; males:  $p = .20$ ).



## 384 4. Discussion

### 385 4.1. Sex-specific alterations of social behavior and activity of *Ptch1*<sup>+/-</sup> females

386 Dysregulation of SHH signaling resulted in a significant interaction of sex and genotype that  
387 drove the female-specific social behavioral effects observed in the novel open-field and partner  
388 preference tasks. *Ptch1*<sup>+/-</sup> females traveled further and had more center crosses in both the  
389 novel open-field and partner preference tasks. In the partner preference task, *Ptch1*<sup>+/-</sup> females  
390 spent increased time with both novel and familiar animals and had increased nose-tail  
391 interactions relative to wild-type mice. In mice, most novel social interactions involve nose-nose  
392 contact, this investigative social activity contrasts with aggressive nose-tail interactions  
393 (Silverman et al., 2010). There were no detected differences in the type or duration of social  
394 behavior displayed in the male *Ptch1*<sup>+/-</sup> mutants. Prosocial phenotypes observed in *Ptch1*<sup>+/-</sup>  
395 females indicated differential responsiveness to dysregulated SHH signaling wherein female sex  
396 exacerbates alterations in social behavior and hyperactivity.

397 Because the *Ptch* knockout mutation used in this study resulted in global deficits of PTCH,  
398 pleiotropic effects from *Ptch1* haploinsufficiency could have contributed to the observed  
399 behavioral changes. The cerebellum is critical in motor movement (Altman and Bayer, 1997),  
400 and disrupted SHH signaling has been linked to changes in olfactory neuron production  
401 (Daynac et al., 2016; Gomez et al., 2019; Ihrle et al., 2011; Tong et al., 2015). To rule out trivial  
402 explanations for altered behaviors observed, we carefully assessed movement in our novel  
403 open-field task for evidence of decrements related to compromises mechano-skeletal ability,  
404 cerebellar control of coordination or movement, and to rule out defects related to olfaction. No  
405 deficits in movement velocity, distance traveled, or latency to find an olfaction cue were  
406 detected. In fact, there was a paradoxical increase in the activity of *Ptch1*<sup>+/-</sup> females indicated by  
407 increases in total distance moved. Sustained activity after the first five minutes indicates a  
408 failure of *Ptch1*<sup>+/-</sup> females to acclimate to the arena (Figure 1C), suggesting more complicated

409 sex-specific impacts than decreased movement coordination or loss of the ability to smell were  
410 responsible for the observed alterations in behavior.

411 Increased activity and prosocial behaviors of *Ptch1*<sup>+/-</sup> females could be explained by a  
412 hyperactivity phenotype. In humans, ADHD has been associated with HPE caused by SHH  
413 mutations primarily in female humans with noted high intellectual function (Heussler et al., 2002;  
414 Solomon et al., 2012), demonstrating that altered SHH signaling can lead to hyperactivity.  
415 Similar to the sex differences observed in *Ptch1*<sup>+/-</sup> female mice, human females are also at  
416 increased risk for diagnosis of HPE with sex ratios ranging from 1.2:1 to 2.3:1 female:male  
417 (Croen et al., 1996; Mouden et al., 2016; Weiss et al., 2018a). The prosocial phenotype  
418 observed in *Ptch1*<sup>+/-</sup> females may be due to a mild sex-specific HPE-like hyperactive phenotype  
419 resulting in indiscriminate social interactions.

#### 420 4.2. Neuroanatomical examination of cerebellar structure

421 The presented findings from behavioral tasks supplement previous work demonstrating  
422 that haploinsufficiency of *Ptch1* can alter cognitive behaviors including reduced motor learning  
423 ability and performance on a spatial memory task by linking dysregulation of SHH signaling with  
424 hyperactivity and altered social behaviors (Antonelli et al., 2018; Dutka et al., 2015). The altered  
425 social behavior in *Ptch1*<sup>+/-</sup> females may be related to cerebellar overgrowth, which is  
426 increasingly appreciated for its role in schizophrenia, dementia, and other psychiatric disorders  
427 (Phillips et al., 2015).

428 Imaging, clinical, and experimental animal studies have linked the cerebellum with  
429 cognitive brain disorders including ASD and BCNS syndrome (Becker and Stoodley, 2013; Lo  
430 Muzio, 2008), with cerebellar hypoplasia and reduced Purkinje cell numbers most commonly  
431 linked with ASD (Bauman, 1991; Palmen et al., 2004). However, investigations mechanistically  
432 linking the cerebellum to cognition and circuits modulating social behavior are preliminary and  
433 deserve further attention (McKimm et al., 2014). There were no detectable differences in the  
434 width of the Purkinje cell monolayer in *Ptch1*<sup>+/-</sup> mice or overt losses of Purkinje cells. Increases

435 in IGL area was generally evident across the entire cerebellum in both male and female *Ptch1*  
436 heterozygotes, indicating that cerebellar phenotypes are likely related to increased proliferation  
437 and density of granule cells that resulted in detectable increases in area of some cerebellar  
438 lobules. While IGL area was generally increased across all lobules, significant cerebellar  
439 overgrowth in the IGL of lobules IV/V and IX was found in both sexes, whereas GCP overgrowth  
440 of lobule III reached significance in females and overgrowth of lobule VII was significant in  
441 males. Lobules IV/V and IX of the cerebellum have previously been identified as sensitive to  
442 SHH pathway defects via mutation of *Gli1*, *Gli2*, and *Smo* (Corrales et al., 2006; Tan et al.,  
443 2018); both *Ptch1*<sup>+/-</sup> males and females developed GCP overgrowth specifically in these two  
444 lobules.

445 The cerebellum is divided into functionally specific regions with lobules I-V and IX often  
446 associated with motor function and working memory in rodents and humans (D'Mello et al.,  
447 2015; Guell et al.; Lawrenson et al., 2018). Reductions in volume of lobules IV/V and IX are also  
448 associated with social impairments in patients with autism (D'Mello et al., 2015). Vermal  
449 hyperplasia of cerebellar lobules VI and VII in a subgroup of autism patients (Courchesne et al.,  
450 1994), and Purkinje cell hyperplasia in lobules IV/V and IX associated with impaired social  
451 behavior have been described (Cupolillo et al., 2016). Because both hypoplasia and overgrowth  
452 of the different layers of the cerebellum are linked to altered social behavior, an appropriate  
453 balance of Purkinje and granule cell inputs are likely necessary for normal cerebellar modulation  
454 of behavior; vermal granule cell hyperplasia in *Ptch1*<sup>+/-</sup> females may be driving the observed  
455 alterations in social behavior and hyperactivity-like phenotype.

456 Treatment for SHH MB is extremely aggressive and involves primary tumor resection  
457 followed by high-dose chemotherapeutics (Kumar et al., 2017). Following treatment, behavioral  
458 decrements of attention and processing speed, learning and memory, language, visual  
459 perception, and executive function are common (Ribi et al., 2005). These neurological  
460 complications, attributed entirely to therapeutic side effects, occur in nearly all MB survivors and

461 resemble behavioral defects and cognitive deficits observed in cerebellar-associated disorders  
462 including HPE, BCNS, and William's Syndrome (Lo Muzio, 2008; Reiss et al., 2004; Weiss et  
463 al., 2018b). Considering that *Ptch1*<sup>+/-</sup> females exhibit altered behavior, some neurological  
464 complications noted in MB survivors may exist prior to treatment as disease etiology rather than  
465 solely a consequence of adverse effects of treatment, and those neurological symptoms could  
466 be different in males and females. Understanding of the behavioral sequelae inherent to, and  
467 the innate sex differences within, MB etiology is critical to improving the treatment plan for MB  
468 patients.

#### 469 4.3. *Cerebellar modulation of social behavior*

470 Consistent with the association between reduced hippocampal size, hyperactivity, learning,  
471 and memory deficits in humans (Al-Amin et al., 2018; Tamnes et al., 2014), *Ptch1*<sup>+/-</sup> female mice  
472 exhibited changes in hippocampal structures associated with altered behavior. Altered  
473 hippocampal structures have previously been reported in *Ptch1*<sup>+/-</sup> male mice, although females  
474 were not examined (Antonelli et al., 2018). SHH signaling directs neurogenesis and is a critical  
475 player in hippocampal plasticity (Yao et al., 2016). *Ptch1*<sup>+/-</sup> females also exhibited increased  
476 cellularity and thickness of cortical layer VI.

477 Cortical layer VI is the earliest developing cortical layer (Gilmore and Herrup, 1997) and  
478 has the greatest diversity of neuronal cell types, with many excitatory pyramidal neurons,  
479 glutamatergic neurons, spiny stellate neurons that project to the thalamus, and local inhibitory  
480 neurons (Briggs, 2010). SHH signaling is critical to mitogenesis and speciation of cortical  
481 progenitors early in development (Yabut and Pleasure, 2018) and SHH signaling induces  
482 cortical growth (Wang et al., 2016). The observed decrement in hippocampal size and  
483 increased cortical layer thickness resulting from decreased SHH signaling provides further  
484 evidence that neuronal changes outside the cerebellum may contribute to noted behavioral  
485 changes in *Ptch1*<sup>+/-</sup> females. The observed behavioral changes in activity and social behavior  
486 could be related to decreases in hippocampal plasticity and the alteration of projections to

487 extracerebellar circuits. Alternatively, the observed changes in cortical and hippocampal  
488 structures may result from an imbalance of extracerebellar inputs or activity to these structures  
489 resulting from the indirect influence of increased cerebellar granule cell numbers due to  
490 increased synaptic inputs on Purkinje cells and subsequent impacts on extracerebellar activity.

491 A potential mechanism linking abnormal cerebellar pathology to impaired social function is  
492 via cerebellar modulation of dopamine release within the mPFC (Rogers et al., 2013b). The  
493 mPFC incorporates cerebellar output through the cerebellar dentate nucleus which modulate  
494 dopamine release in the mPFC via two primary pathways that appear to contribute equally to  
495 mPFC activation: 1) contralateral glutamatergic projections from the cerebellar dentate nucleus  
496 to reticulotegmental nuclei that project to pedunculo-pontine nuclei and stimulate mesocortical  
497 dopaminergic neurons in the ventral tegmental area (VTA), which then project to the mPFC, or  
498 2) contralateral glutamatergic projections of the cerebellar dentate nucleus project to thalamic  
499 mediodorsal and ventrolateral nuclei (ThN md and ThN vl) that send glutamatergic effects to the  
500 mPFC to modulate mesocortical dopaminergic terminal release in the mPFC via excitatory  
501 glutamatergic synapses (McKimm et al., 2014) (Figure 5).

502 Changes in projections through the VTA may explain why *Ptch1*<sup>+/-</sup> females display altered  
503 social behavior, because SHH is necessary for the specification of dopamine cell fate in the  
504 VTA (Blaess et al., 2011). Supporting this possibility, experimental mutation of the *Ptch*  
505 coreceptor, *Cdon* in mice, increased numbers of dopamine neurons in the VTA and elevated  
506 levels of dopamine and its metabolites in the mPFC (Verwey et al., 2016). Thus, alterations in  
507 dopamine release within the mPFC might explain the increased activity and altered social  
508 behavior observed in female *Ptch*<sup>+/-</sup> mice. Supporting this possibility, mice with conditional  
509 inactivation of *Smo* specifically in dopamine cells are hyperactive (Zhou et al., 2016), whereas  
510 dopamine receptor D1 blockade in the mPFC of rats reduces the distance traveled in an open-  
511 field task (Hall et al., 2009). Those studies suggest that cerebellar-related increases in mPFC

512 dopamine release might mediate the alterations in activity and social observed in the *Ptch1*<sup>+/-</sup>  
513 females.

#### 514 4.4. Female-specific effects of *Ptch1* mutation

515 The more severe cerebellar overgrowth and behavior phenotypes observed in female  
516 *Ptch1*<sup>+/-</sup> mice could also be explained by increased responsiveness of GCPs to circulating  
517 estrogens. It is notable that in SHH mouse models of MB the incidence of tumors is higher in  
518 females (Svärd et al., 2009). Estrogens also play important roles in regulating cerebellar  
519 granule cell proliferation and MB progression (Guillette et al., 2018). Considering the  
520 progressive nature of MB development in *Ptch1*<sup>+/-</sup>, the apparent increased sensitivity of females  
521 to dysregulated SHH signaling could be related to the increased levels of circulating estrogens  
522 in mature females. These activities of estrogen are mediated through modulation of rapid  
523 estrogen signaling, estrogen receptor-regulated gene expression, and resulting modulation of  
524 growth factor-related signal transduction pathways (Cookman and Belcher, 2015; Garcia-  
525 Segura et al., 2006). Increased activation of ER $\beta$  signaling increases GCP mitogenesis and  
526 migration, and upregulates neuroprotective mechanisms in mature granule cells, which also act  
527 in the etiology and progression of MB to drive tumor progression (Belcher, 2008; Cookman and  
528 Belcher, 2015; Guillette et al., 2018). It is possible that the more severe phenotypes detected in  
529 *Ptch1*<sup>+/-</sup> female mice are related to a relative increase in estrogen signaling in ER $\beta$  positive  
530 *Ptch1*<sup>+/-</sup> granule cell-like precursors. It is also possible that sex-related differences in the  
531 proposed dopaminergic cerebellar-mPFC circuitry, leading to differential dopamine release or  
532 dopamine receptor activity in the mPFC, could sex-specifically contribute to differences in  
533 structural organization and behaviors that are associated with decreased SHH signaling.

#### 534 5. Conclusion

535 The disruption of SHH-signaling in *Ptch1*<sup>+/-</sup> mice causes lobule-specific overgrowth in  
536 cerebellar structures previously linked to ASD in both sexes. Additionally, *Ptch1*<sup>+/-</sup> mice

537 exhibited female-specific alterations in the hippocampus and cortical layers, hyperactivity, and  
538 altered social behaviors. Based on these findings, it is proposed that a subset of the behavioral  
539 phenotypes observed in MB patients following treatment are a component of MB sequelae  
540 rather than side effects of treatment. Further work focusing on the role of estrogen and SHH  
541 signaling cross-talk is needed to elucidate the developmental and functional nature of the  
542 proposed cerebellar-mPFC circuitry and the functional role of the cerebellum as a mediator of  
543 sex-specific behaviors.

544

545 **Acknowledgements:**

546 We are indebted to Dr. Heather Patisaul for assistance with the design and analysis of the  
547 behavioral studies, Dr. Theresa Guillette and the other members of the Belcher and Patisaul  
548 labs who assisted in various aspects of the study and gave critical feed-back on the manuscript.  
549 We would also like to express our great appreciation for the support of Sandy Elliott and the  
550 staff of the NCSU BRF who go above and beyond to facilitate our animal studies.

551 **Figure Legend**

552 Figure 1. Behavioral assessment using a novel open-field task. Maximum velocity (A), total  
553 distance traveled (B), and distance traveled over 5-min periods in females (C) and males (D)  
554 are shown. Values are expressed as mean  $\pm$  SEM. \* =  $p < .05$ . Final animal numbers animals  
555 used for novel social task follow. Females: wild-type, n=18; *Ptch1*<sup>+/-</sup>, n=18. Males: wild-type,  
556 n=23; *Ptch1*<sup>+/-</sup>, n=13. Three wild-type females were excluded because they climbed atop the  
557 holding cup and avoided the task.

558 Figure 2. Behavioral assessment using a partner preference task. Duration of interactions with  
559 novel and familiar animals (A), the number of those interactions (B), and the type of those  
560 interactions (C) are shown. Lower-cased (a) and (b) illustrate significant differences within each  
561 level of the ANOVA compared to wild-type females. Values are expressed as mean  $\pm$  SEM. \* =  
562  $p < .05$ . Final animal numbers animals used for partner preference task follow. Females: wild-  
563 type, n=17; *Ptch1*<sup>+/-</sup>, n=14. Males: wild-type, n=19; *Ptch1*<sup>+/-</sup>, n=12. One wild-type female that  
564 climbed atop the holding cup and avoided performing the task was excluded.

565 Figure 3. Assessment of changes in cerebellar structures. Sagittal cerebellar section (20  $\mu$ m)  
566 showing lobular definition in a Wild-Type female, with cerebellar lobules (II – X) and the fourth  
567 ventricle labeled (V4). The lobular structures are outlined as quantified (A). The hatched outline  
568 in (A) denotes the region compared to a *Ptch1*<sup>+/-</sup> female (B), where differences in *Ptch1*<sup>+/-</sup>  
569 females are highlighted with an arrow indicating ectopic overgrowth and asterisks showing  
570 overgrowth of lobule IX (B). A wild-type male (C) and *Ptch1*<sup>+/-</sup> male (D) are also shown.  
571 Individual lobular IGL area are shown (E). Scale bar = 1 mm. Values are expressed as mean  $\pm$   
572 SEM. \* =  $p < .05$ . Final animal numbers animals used for IGL area comparison follow. Females:  
573 wild-type, n=9; *Ptch1*<sup>+/-</sup>, n=5. Males: wild-type, n=9; *Ptch1*<sup>+/-</sup>, n=9.



574 Figure 4. Assessment of changes in cortical structures. Coronal brain section (40  $\mu$ m)  
575 highlighting measured regions of cortex (CTX), ammon's horn (CA1, CA3), dentate gyrus (DG)  
576 (A) with region identified using caudate putamen (CP) and thalamus (TH) as landmarks. Inset  
577 image shows cortical layers (labeled I, II-IV, V, and VI of WT female (B) and *Ptch*<sup>+/-</sup> female  
578 mouse (C). Ammon's horn (CA1-3), dentate gyrus, and cerebral cortex are outlined in red.  
579 Cortical layers are labeled I, II-IV, V, and VI. Scale bar = 1 mm (A) and 500  $\mu$ m (B,C).  
580 Expressed as mean  $\pm$  SEM. \* =  $p < .05$ . For overall cortical layer length and width, the number  
581 of analyzed animals follow. Females: wild-type, n=4; *Ptch*<sup>+/-</sup>, n=4. Males: wild-type, n=6;  
582 *Ptch*<sup>+/-</sup>, n=4. Final animal numbers for individual cortical layers follow. Females: wild-type, n=4;  
583 *Ptch*<sup>+/-</sup>, n=3. Males: wild-type, n=6; *Ptch*<sup>+/-</sup>, n=3.

584 Figure 5. Proposed pathway of cerebello-cortical circuitry. Shown is a cartoon of the proposed  
585 neuronal circuits linking outputs from the cerebellar cortex (CBX) to projections from deep  
586 cerebellar nuclei (DN) to neurons in the prefrontal cortex (PFC) via the tegmental reticular nuclei  
587 (TRN), pedunculo-pontine nuclei (PPN), the ventral tegmental area (VTA), thalamic mediodorsal  
588 (MD) and ventrolateral (VL) nuclei, and pontine reticular nuclei (PRN).

589 **References:**

- 590 Al-Amin, M., Zinchenko, A., and Geyer, T. (2018). Hippocampal subfield volume  
591 changes in subtypes of attention deficit hyperactivity disorder. *Brain Res.* *1685*, 1–8.
- 592 Altman, J., and Bayer, S.A. (1997). *Development of the cerebellar system: in relation to*  
593 *its evolution, structure, and functions* (CRC Press).
- 594 Antonelli, F., Casciati, A., Tanori, M., Tanno, B., Linares-Vidal, M.V., Serra, N., Bellés,  
595 M., Pannicelli, A., Saran, A., and Pazzaglia, S. (2018). Alterations in Morphology and  
596 Adult Neurogenesis in the Dentate Gyrus of Patched1 Heterozygous Mice. *Front. Mol.*  
597 *Neurosci.* *11*.
- 598 Bailey, K.R., and Crawley, J.N. (2009). Anxiety-Related Behaviors in Mice. In *Methods*  
599 *of Behavior Analysis in Neuroscience*, J.J. Buccafusco, ed. (Boca Raton (FL): CRC  
600 Press/Taylor & Francis), p.
- 601 Bauman, M.L. (1991). Microscopic neuroanatomic abnormalities in autism. *Pediatrics*  
602 *87*, 791–796.
- 603 Becker, E.B.E., and Stoodley, C.J. (2013). Autism spectrum disorder and the  
604 cerebellum. *Int. Rev. Neurobiol.* *113*, 1–34.
- 605 Belcher, S.M. (2008). Rapid signaling mechanisms of estrogens in the developing  
606 cerebellum. *Brain Res. Rev.* *57*, 481–492.
- 607 Blaess, S., Bodea, G.O., Kabanova, A., Chanut, S., Mugniery, E., Derouiche, A.,  
608 Stephen, D., and Joyner, A.L. (2011). Temporal-spatial changes in Sonic Hedgehog  
609 expression and signaling reveal different potentials of ventral mesencephalic  
610 progenitors to populate distinct ventral midbrain nuclei. *Neural Develop.* *6*, 29.
- 611 Briggs, F. (2010). Organizing Principles of Cortical Layer 6. *Front. Neural Circuits* *4*.
- 612 Cookman, C.J., and Belcher, S.M. (2015). Estrogen Receptor- $\beta$  Up-Regulates IGF1R  
613 Expression and Activity to Inhibit Apoptosis and Increase Growth of Medulloblastoma.  
614 *Endocrinology* *156*, 2395–2408.
- 615 Corrales, J.D., Blaess, S., Mahoney, E.M., and Joyner, A.L. (2006). The level of sonic  
616 hedgehog signaling regulates the complexity of cerebellar foliation. *Dev. Camb. Engl.*  
617 *133*, 1811–1821.
- 618 Courchesne, E., Saitoh, O., Yeung-Courchesne, R., Press, G.A., Lincoln, A.J., Haas,  
619 R.H., and Schreibman, L. (1994). Abnormality of cerebellar vermal lobules VI and VII  
620 in patients with infantile autism: identification of hypoplastic and hyperplastic subgroups  
621 with MR imaging. *AJR Am. J. Roentgenol.* *162*, 123–130.
- 622 Croen, L.A., Shaw, G.M., and Lammer, E.J. (1996). Holoprosencephaly: epidemiologic  
623 and clinical characteristics of a California population. *Am. J. Med. Genet.* *64*, 465–472.

- 624 Cupolillo, D., Hoxha, E., Faralli, A., De Luca, A., Rossi, F., Tempia, F., and Carulli, D.  
625 (2016). Autistic-Like Traits and Cerebellar Dysfunction in Purkinje Cell *PTEN* Knock-Out  
626 Mice. *Neuropsychopharmacology* *41*, 1457–1466.
- 627 Dahmane, N., and Ruiz i Altaba, A. (1999). Sonic hedgehog and cerebellum  
628 development. *12*.
- 629 Daynac, M., Tirou, L., Faure, H., Mouthon, M.-A., Gauthier, L.R., Hahn, H., Boussin,  
630 F.D., and Ruat, M. (2016). Hedgehog Controls Quiescence and Activation of Neural  
631 Stem Cells in the Adult Ventricular-Subventricular Zone. *Stem Cell Rep.* *7*, 735–748.
- 632 Dey, J., Ditzler, S., Knoblauch, S.E., Hatton, B.A., Schelter, J.M., Cleary, M.A.,  
633 Mecham, B., Rorke-Adams, L.B., and Olson, J.M. (2012). A Distinct Smoothed  
634 Mutation Causes Severe Cerebellar Developmental Defects and Medulloblastoma in a  
635 Novel Transgenic Mouse Model. *Mol. Cell. Biol.* *32*, 4104–4115.
- 636 D’Mello, A.M., Crocetti, D., Mostofsky, S.H., and Stoodley, C.J. (2015). Cerebellar gray  
637 matter and lobular volumes correlate with core autism symptoms. *NeuroImage Clin.* *7*,  
638 631–639.
- 639 Dutka, T., Hallberg, D., and Reeves, R.H. (2015). Chronic up-regulation of the SHH  
640 pathway normalizes some developmental effects of trisomy in Ts65Dn mice. *Mech.*  
641 *Dev.* *0*, 68–80.
- 642 Garcia-Segura, L.M., Sanz, A., and Mendez, P. (2006). Cross-talk between IGF-I and  
643 estradiol in the brain: focus on neuroprotection. *Neuroendocrinology* *84*, 275–279.
- 644 Gilmore, E.C., and Herrup, K. (1997). Cortical development: Layers of complexity. *Curr.*  
645 *Biol.* *7*, R231–R234.
- 646 Gloude, N.J., Yoon, J.M., and Crawford, J.R. (2016). Novel PTCH1 Mutation in a Young  
647 Child With Gorlin Syndrome and Medulloblastoma. *Pediatr. Blood Cancer* *63*, 1128–  
648 1129.
- 649 Gomez, H.G., Noguchi, H., Castillo, J.G., Aguilar, D., Pleasure, S.J., and Yabut, O.R.  
650 (2019). Suppressor of Fused regulates the proliferation of postnatal neural stem and  
651 precursor cells via a Gli3-dependent mechanism. *Biol. Open* *8*.
- 652 Goodrich, L.V., Milenković, L., Higgins, K.M., and Scott, M.P. (1997). Altered neural cell  
653 fates and medulloblastoma in mouse patched mutants. *Science* *277*, 1109–1113.
- 654 Grammel, D., Warmuth-Metz, M., von Bueren, A.O., Kool, M., Pietsch, T., Kretzschmar,  
655 H.A., Rowitch, D.H., Rutkowski, S., Pfister, S.M., and Schüller, U. (2012). Sonic  
656 hedgehog-associated medulloblastoma arising from the cochlear nuclei of the  
657 brainstem. *Acta Neuropathol. (Berl.)* *123*, 601–614.
- 658 Guell, X., Schmahmann, J.D., Gabrieli, J.D., and Ghosh, S.S. Functional gradients of  
659 the cerebellum. *ELife* *7*.

- 660 Guillette, T.C., Jackson, T.W., and Belcher, S.M. (2018). Duality of estrogen receptor  $\beta$   
661 action in cancer progression. *Curr. Opin. Pharmacol.* *41*, 66–73.
- 662 Hahn, H., Wicking, C., Zaphiropoulos, P.G., Gailani, M.R., Shanley, S., Chidambaram,  
663 A., Vorechovsky, I., Holmberg, E., Uden, A.B., Gillies, S., et al. (1996). Mutations of  
664 the Human Homolog of Drosophila patched in the Nevroid Basal Cell Carcinoma  
665 Syndrome. *Cell* *85*, 841–851.
- 666 Haldipur, P., Bharti, U., Govindan, S., Sarkar, C., Iyengar, S., Gressens, P., and Mani,  
667 S. (2011). Expression of Sonic Hedgehog During Cell Proliferation in the Human  
668 Cerebellum. *Stem Cells Dev.* *21*, 1059–1068.
- 669 Hall, D.A., Powers, J.P., and Gulley, J.M. (2009). Blockade of D1 dopamine receptors in  
670 the medial prefrontal cortex attenuates amphetamine- and methamphetamine-induced  
671 locomotor activity in the rat. *Brain Res.* *1300*, 51–57.
- 672 Hallahan, A.R., Pritchard, J.I., Hansen, S., Benson, M., Stoeck, J., Hatton, B.A.,  
673 Russell, T.L., Ellenbogen, R.G., Bernstein, I.D., Beachy, P.A., et al. (2004). The SmoA1  
674 Mouse Model Reveals That Notch Signaling Is Critical for the Growth and Survival of  
675 Sonic Hedgehog-Induced Medulloblastomas. *Cancer Res.* *64*, 7794–7800.
- 676 Heussler, H., Suri, M., Young, I., and Muenke, M. (2002). Extreme variability of  
677 expression of a Sonic Hedgehog mutation: attention difficulties and holoprosencephaly.  
678 *Arch. Dis. Child.* *86*, 293–296.
- 679 Ihrie, R.A., Shah, J.K., Harwell, C.C., Levine, J.H., Guinto, C.D., Lezameta, M.,  
680 Kriegstein, A.R., and Alvarez-Buylla, A. (2011). Persistent sonic hedgehog signaling in  
681 adult brain determines neural stem cell positional identity. *Neuron* *71*, 250–262.
- 682 Jakab, R.L., Wong, J.K., and Belcher, S.M. (2001). Estrogen receptor beta  
683 immunoreactivity in differentiating cells of the developing rat cerebellum. *J. Comp.*  
684 *Neurol.* *430*, 396–409.
- 685 Kumar, V., Kumar, V., McGuire, T., Coulter, D.W., Sharp, J.G., and Mahato, R.I. (2017).  
686 Challenges and Recent Advances in Medulloblastoma Therapy. *Trends Pharmacol. Sci.*  
687 *38*, 1061–1084.
- 688 Lacombe, D., Chateil, J.F., Fontan, D., and Battin, J. (1990). Medulloblastoma in the  
689 nevoid basal-cell carcinoma syndrome: case reports and review of the literature. *Genet.*  
690 *Couns. Geneva Switz.* *1*, 273–277.
- 691 Lawrenson, C., Bares, M., Kamondi, A., Kovács, A., Lumb, B., Apps, R., Filip, P., and  
692 Manto, M. (2018). The mystery of the cerebellum: clues from experimental and clinical  
693 observations. *Cerebellum Ataxias* *5*.
- 694 Lee, Y., Kawagoe, R., Sasai, K., Li, Y., Russell, H.R., Curran, T., and McKinnon, P.J.  
695 (2007). Loss of suppressor-of-fused function promotes tumorigenesis. *Oncogene* *26*,  
696 6442–6447.

- 697 Lo Muzio, L. (2008). Nevroid basal cell carcinoma syndrome (Gorlin syndrome).  
698 *Orphanet J. Rare Dis.* 3, 32.
- 699 Martinez, S., Andreu, A., Mecklenburg, N., and Echevarria, D. (2013). Cellular and  
700 molecular basis of cerebellar development. *Front. Neuroanat.* 7.
- 701 McKimm, E., Corkill, B., Goldowitz, D., Albritton, L.M., Homayouni, R., Blaha, C.D., and  
702 Mittleman, G. (2014). Glutamate dysfunction associated with developmental cerebellar  
703 damage: relevance to autism spectrum disorders. *Cerebellum Lond. Engl.* 13, 346–353.
- 704 Ming, J.E., Kaupas, M.E., Roessler, E., Brunner, H.G., Golabi, M., Tekin, M., Stratton,  
705 R.F., Sujansky, E., Bale, S.J., and Muenke, M. (2002). Mutations in *PATCHED-1*, the  
706 receptor for *SONIC HEDGEHOG*, are associated with holoprosencephaly. *Hum. Genet.*  
707 110, 297–301.
- 708 Mouden, C., Dubourg, C., Carré, W., Rose, S., Quelin, C., Akloul, L., Hamdi-Rozé, H.,  
709 Viot, G., Salhi, H., Darnault, P., et al. (2016). Complex mode of inheritance in  
710 holoprosencephaly revealed by whole exome sequencing. *Clin. Genet.* 89, 659–668.
- 711 Nanni, L., Ming, J.E., Bocian, M., Steinhaus, K., Bianchi, D.W., Die-Smulders, C.,  
712 Giannotti, A., Imaizumi, K., Jones, K.L., Campo, M.D., et al. (1999). The mutational  
713 spectrum of the sonic hedgehog gene in holoprosencephaly: *SHH* mutations cause a  
714 significant proportion of autosomal dominant holoprosencephaly. *Hum. Mol. Genet.* 8,  
715 2479–2488.
- 716 Nitzki, F., Becker, M., Frommhold, A., Schulz-Schaeffer, W., and Hahn, H. (2012).  
717 *Patched* Knockout Mouse Models of Basal Cell Carcinoma. *J. Skin Cancer* 2012.
- 718 Northcott, P.A., Dubuc, A.M., Pfister, S., and Taylor, M.D. (2012). Molecular subgroups  
719 of medulloblastoma. *Expert Rev. Neurother.* 12, 871–884.
- 720 Okamoto, N., Naruto, T., Kohmoto, T., Komori, T., and Imoto, I. (2014). A novel *PTCH1*  
721 mutation in a patient with Gorlin syndrome. *Hum. Genome Var.* 1, 14022.
- 722 Palmen, S.J.M.C., van Engeland, H., Hof, P.R., and Schmitz, C. (2004).  
723 Neuropathological findings in autism. *Brain J. Neurol.* 127, 2572–2583.
- 724 Phillips, J.R., Hewedi, D.H., Eissa, A.M., and Moustafa, A.A. (2015). The Cerebellum  
725 and Psychiatric Disorders. *Front. Public Health* 3.
- 726 Rahimi-Balaei, M., Bergen, H., Kong, J., and Marzban, H. (2018). Neuronal Migration  
727 During Development of the Cerebellum. *Front. Cell. Neurosci.* 12.
- 728 Reiss, A.L., Eckert, M.A., Rose, F.E., Karchemskiy, A., Kesler, S., Chang, M., Reynolds,  
729 M.F., Kwon, H., and Galaburda, A. (2004). An Experiment of Nature: Brain Anatomy  
730 Parallels Cognition and Behavior in Williams Syndrome. *J. Neurosci. Off. J. Soc.*  
731 *Neurosci.* 24, 5009–5015.

- 732 Ribi, K., Relly, C., Landolt, M.A., Alber, F.D., Boltshauser, E., and Grotzer, M.A. (2005).  
733 Outcome of medulloblastoma in children: long-term complications and quality of life.  
734 *Neuropediatrics* 36, 357–365.
- 735 Rogers, T.D., McKimm, E., Dickson, P.E., Goldowitz, D., Blaha, C.D., and Mittleman, G.  
736 (2013a). Is autism a disease of the cerebellum? An integration of clinical and pre-clinical  
737 research. *Front. Syst. Neurosci.* 7.
- 738 Rogers, T.D., Dickson, P.E., McKimm, E., Heck, D.H., Goldowitz, D., Blaha, C.D., and  
739 Mittleman, G. (2013b). Reorganization of circuits underlying cerebellar modulation of  
740 prefrontal cortical dopamine in mouse models of autism spectrum disorder. *Cerebellum*  
741 *Lond. Engl.* 12.
- 742 Schüller, U., Heine, V.M., Mao, J., Kho, A.T., Dillon, A.K., Han, Y.-G., Huillard, E., Sun,  
743 T., Ligon, A.H., Qian, Y., et al. (2008). Acquisition of Granule Neuron Precursor Identity  
744 Is a Critical Determinant of Progenitor Cell Competence to Form Shh-Induced  
745 Medulloblastoma. *Cancer Cell* 14, 123–134.
- 746 Shiohama, T., Fujii, K., Miyashita, T., Mizuochi, H., Uchikawa, H., and Shimojo, N.  
747 (2017). Brain morphology in children with nevoid basal cell carcinoma syndrome. *Am. J.*  
748 *Med. Genet. A.* 173, 946–952.
- 749 Silverman, J.L., Yang, M., Lord, C., and Crawley, J.N. (2010). Behavioural phenotyping  
750 assays for mouse models of autism. *Nat. Rev. Neurosci.* 11, 490–502.
- 751 Solomon, B.D., Mercier, S., Vélez, J.I., Pineda-Alvarez, D.E., Wyllie, A., Zhou, N.,  
752 Dubourg, C., David, V., Odent, S., Roessler, E., et al. (2010). Analysis of Genotype-  
753 Phenotype Correlations in Human Holoprosencephaly. *Am. J. Med. Genet. C Semin.*  
754 *Med. Genet.* 154C, 133–141.
- 755 Solomon, B.D., Pineda-Alvarez, D.E., Gropman, A.L., Willis, M.J., Hadley, D.W., and  
756 Muenke, M. (2012). High Intellectual Function in Individuals with Mutation-Positive  
757 Microform Holoprosencephaly. *Mol. Syndromol.* 3, 140–142.
- 758 Sun, T., Plutynski, A., Ward, S., and Rubin, J.B. (2015). An integrative view on sex  
759 differences in brain tumors. *Cell. Mol. Life Sci.* 72, 3323–3342.
- 760 Svärd, J., Rozell, B., Toftgård, R., and Teglund, S. (2009). Tumor suppressor gene co-  
761 operativity in compound Patched1 and Suppressor of fused heterozygous mutant mice.  
762 *Mol. Carcinog.* 48, 408–419.
- 763 Tamnes, C.K., Walhovd, K.B., Engvig, A., Grydeland, H., Krogsrud, S.K., stby, Y.,  
764 Holland, D., Dale, A.M., and Fjell, A.M. (2014). Regional Hippocampal Volumes and  
765 Development Predict Learning and Memory. *Dev. Neurosci.* 36, 161–174.
- 766 Tan, I.-L., Wojcinski, A., Rallapalli, H., Lao, Z., Sanghrajka, R.M., Stephen, D., Volkova,  
767 E., Korshunov, A., Remke, M., Taylor, M.D., et al. (2018). Lateral cerebellum is

- 768 preferentially sensitive to high sonic hedgehog signaling and medulloblastoma  
769 formation. *Proc. Natl. Acad. Sci.* *115*, 3392–3397.
- 770 Tong, C.K., Fuentealba, L.C., Shah, J.K., Lindquist, R.A., Ihrie, R.A., Guinto, C.D.,  
771 Rodas-Rodriguez, J.L., and Alvarez-Buylla, A. (2015). A Dorsal SHH-Dependent  
772 Domain in the V-SVZ Produces Large Numbers of Oligodendroglial Lineage Cells in the  
773 Postnatal Brain. *Stem Cell Rep.* *5*, 461–470.
- 774 Turner, A.H., Greenspan, K.S., and van Erp, T.G.M. (2016). Pallidum and lateral  
775 ventricle volume enlargement in autism spectrum disorder. *Psychiatry Res.*  
776 *Neuroimaging* *252*, 40–45.
- 777 Uziel, T. (2005). The tumor suppressors Ink4c and p53 collaborate independently with  
778 Patched to suppress medulloblastoma formation. *Genes Dev.* *19*, 2656–2667.
- 779 Verwey, M., Grant, A., Meti, N., Abye-White, L., Torres-Berrío, A., Rioux, V., Lévesque,  
780 M., Charron, F., and Flores, C. (2016). Mesocortical Dopamine Phenotypes in Mice  
781 Lacking the Sonic Hedgehog Receptor Cdon. *ENeuro* *3*.
- 782 Wang, L., Hou, S., and Han, Y.-G. (2016). Hedgehog signaling promotes basal  
783 progenitor expansion and the growth and folding of the neocortex. *Nat. Neurosci.* *19*,  
784 888–896.
- 785 Weiss, K., Kruszka, P., Guillen Sacoto, M.J., Addissie, Y.A., Hadley, D.W., Hadsall,  
786 C.K., Stokes, B., Hu, P., Roessler, E., Solomon, B., et al. (2018a). In-depth  
787 investigations of adolescents and adults with holoprosencephaly identify unique  
788 characteristics. *Genet. Med.* *20*, 14–23.
- 789 Weiss, K., Kruszka, P.S., Levey, E., and Muenke, M. (2018b). Holoprosencephaly from  
790 conception to adulthood. *Am. J. Med. Genet. C Semin. Med. Genet.* *178*, 122–127.
- 791 Wetmore, C., Eberhart, D.E., and Curran, T. (2001). Loss of p53 but not ARF  
792 Accelerates Medulloblastoma in Mice Heterozygous for patched. *Cancer Res.* *61*, 513–  
793 516.
- 794 Winslow, J.T. (2003). Mouse Social Recognition and Preference. *Curr. Protoc.*  
795 *Neurosci.* *22*, 8.16.1-8.16.16.
- 796 Yabut, O.R., and Pleasure, S.J. (2018). Sonic Hedgehog Signaling Rises to the  
797 Surface: Emerging Roles in Neocortical Development. *Brain Plast.* *3*, 119–128.
- 798 Yang, M., and Crawley, J.N. (2009). Simple Behavioral Assessment of Mouse Olfaction.  
799 *Curr. Protoc. Neurosci.* *48*, 8.24.1-8.24.12.
- 800 Yao, P.J., Petralia, R.S., and Mattson, M.P. (2016). Sonic Hedgehog Signaling and  
801 Hippocampal Neuroplasticity. *Trends Neurosci.* *39*, 840–850.

- 802 Zhou, X., Pace, J., Filichia, E., Lv, T., Davis, B., Hoffer, B., Selman, W., and Luo, Y.  
803 (2016). Effect of the sonic hedgehog receptor smoothed on the survival and function  
804 of dopaminergic neurons. *Exp. Neurol.* 283, 235–245.
- 805 Zurawel, R.H., Allen, C., Wechsler-Reya, R., Scott, M.P., and Raffel, C. (2000).  
806 Evidence that haploinsufficiency of Ptch leads to medulloblastoma in mice. *Genes.*  
807 *Chromosomes Cancer* 28, 77–81.



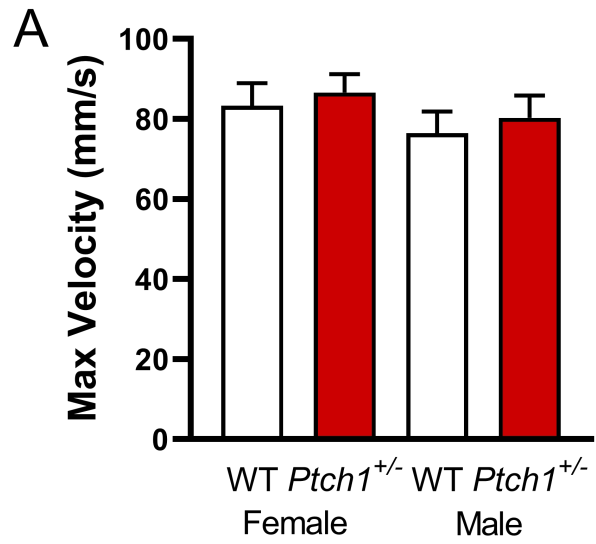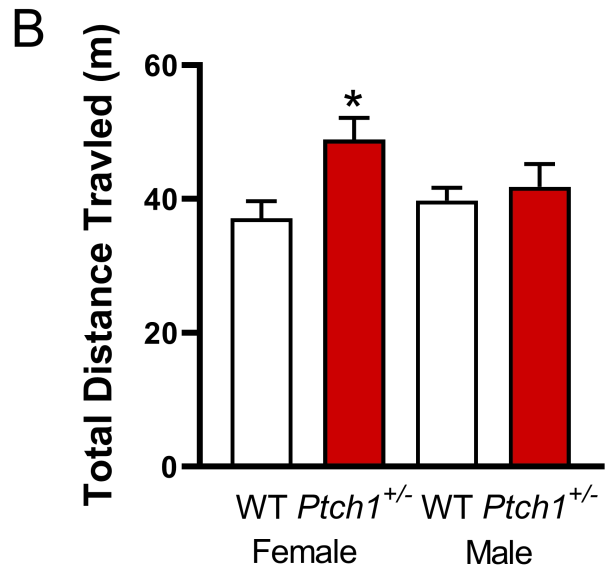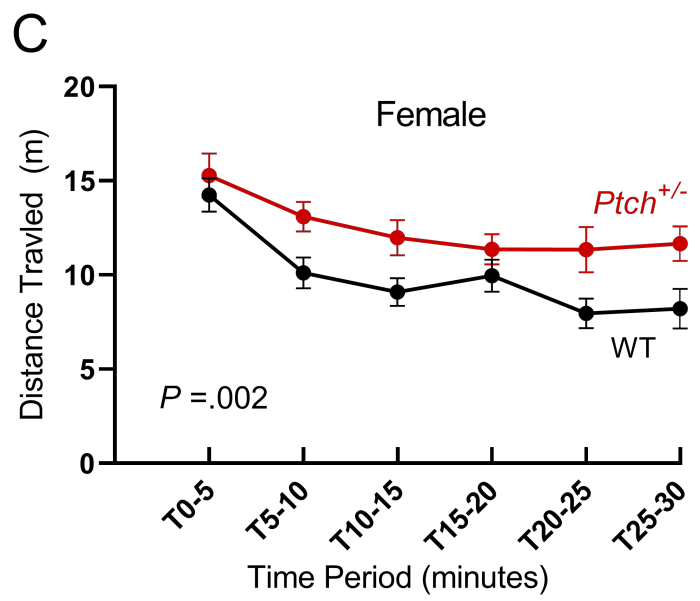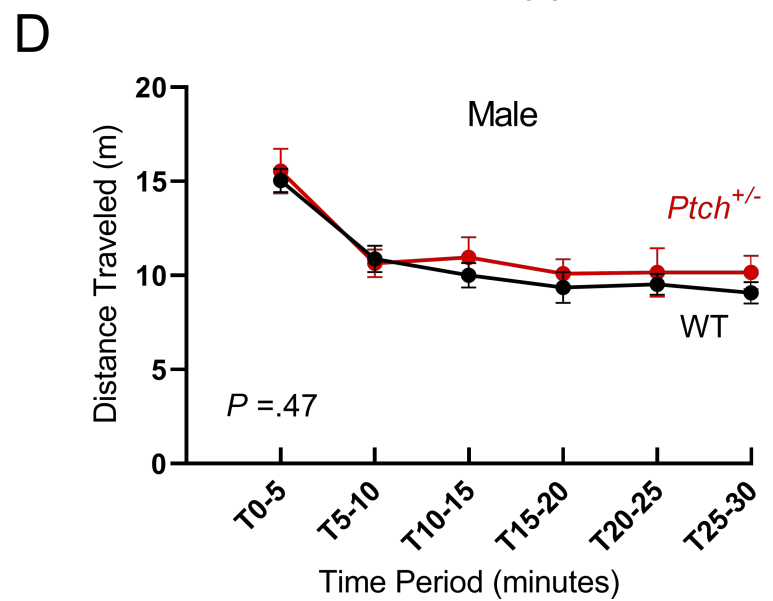

A

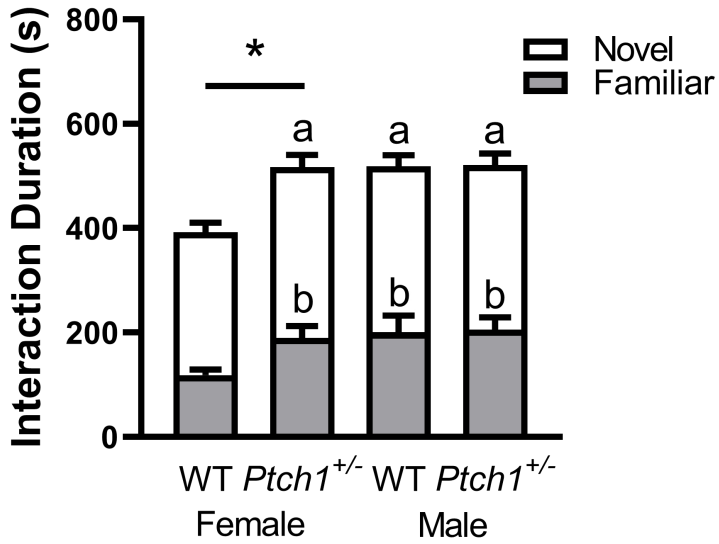

B

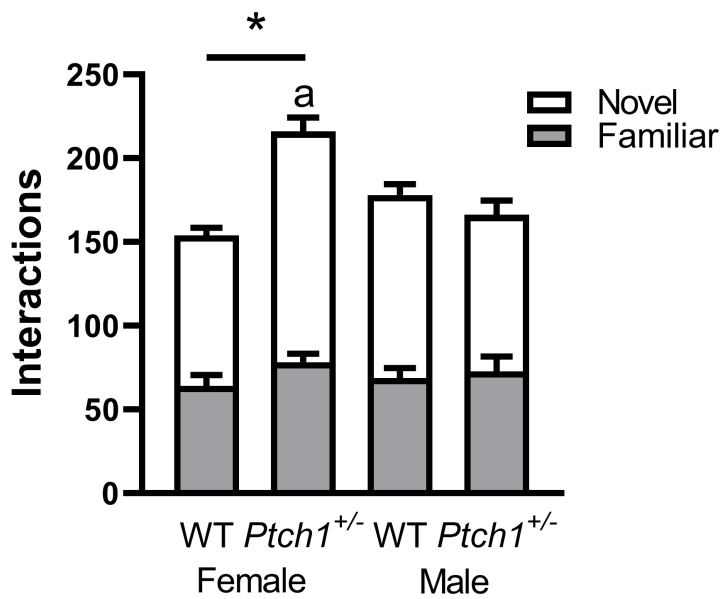

C

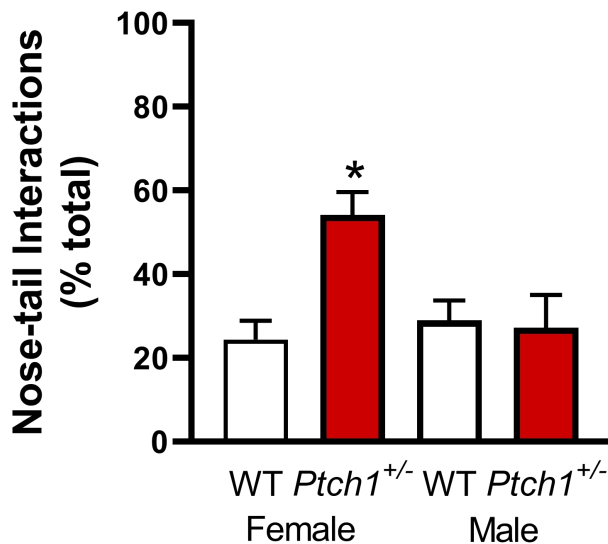

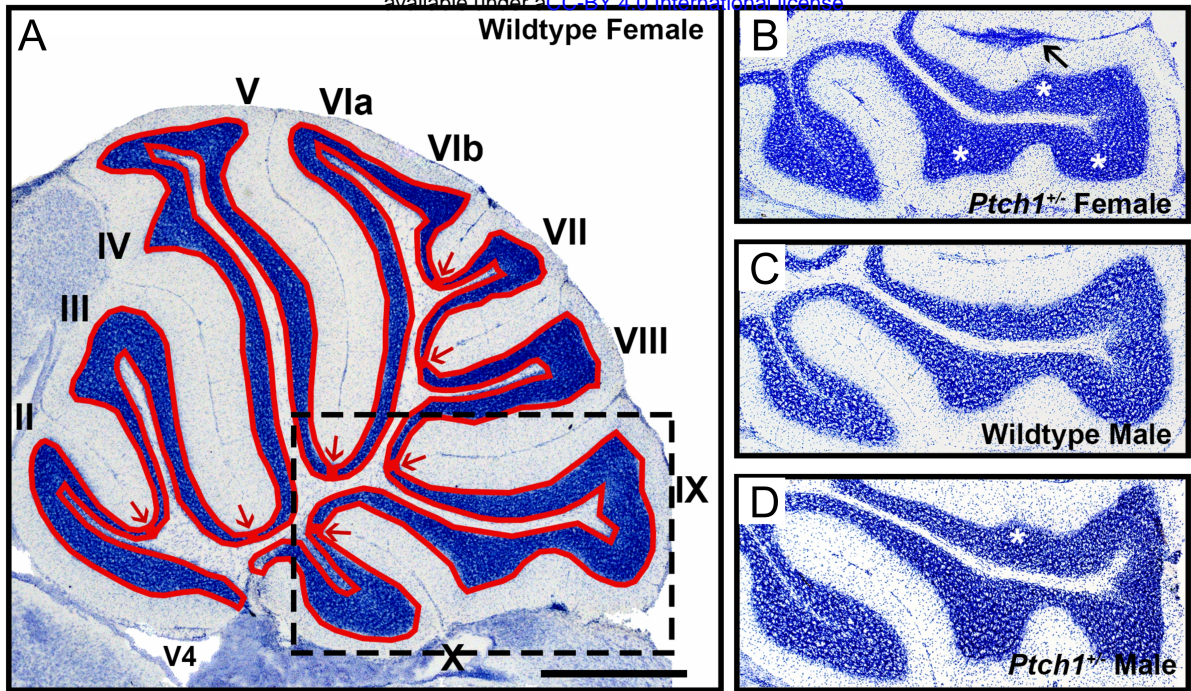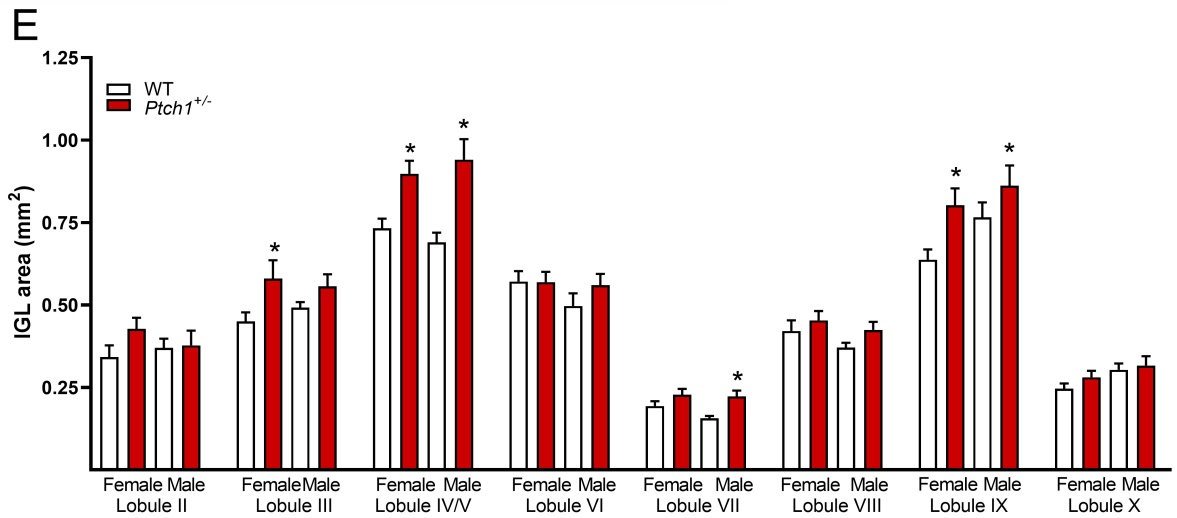

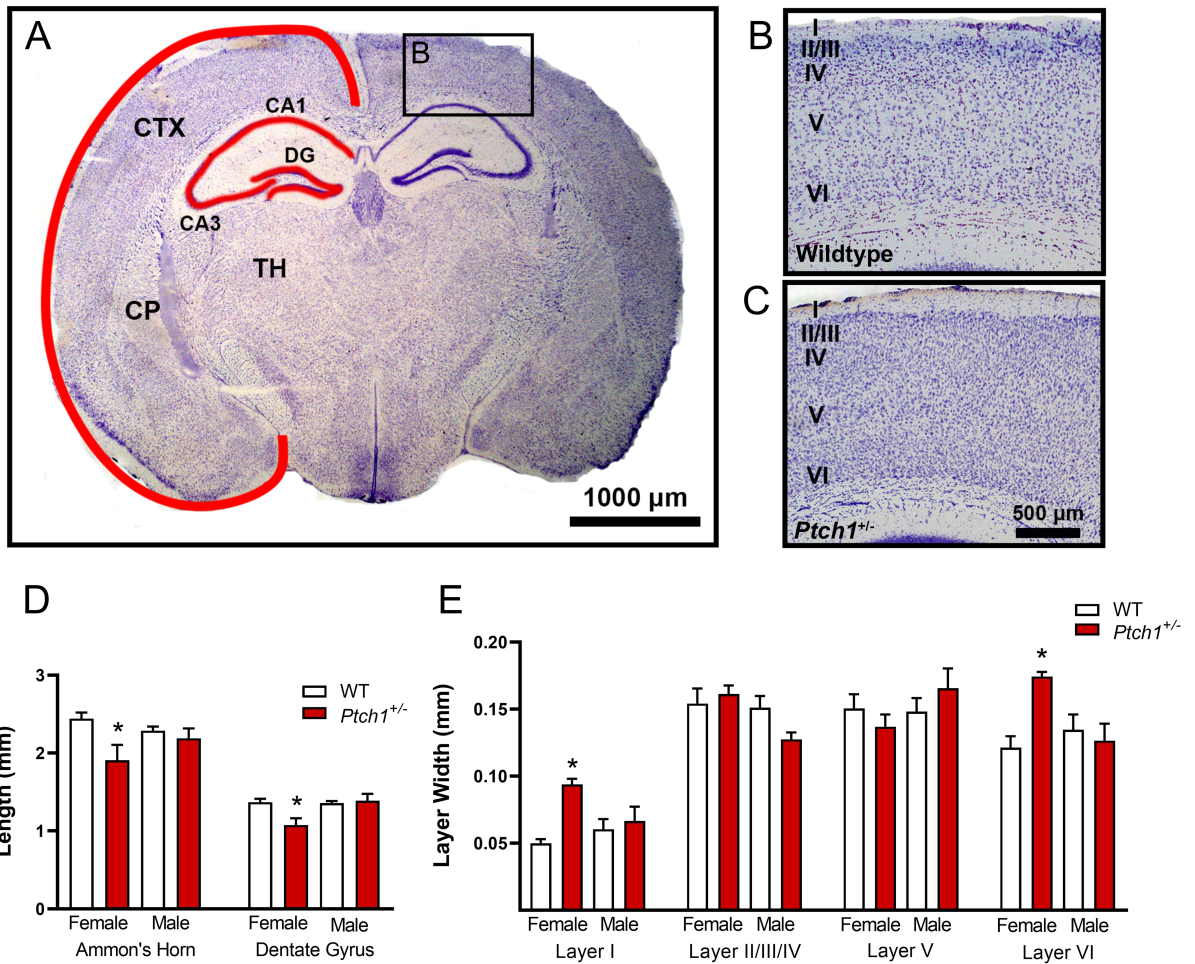

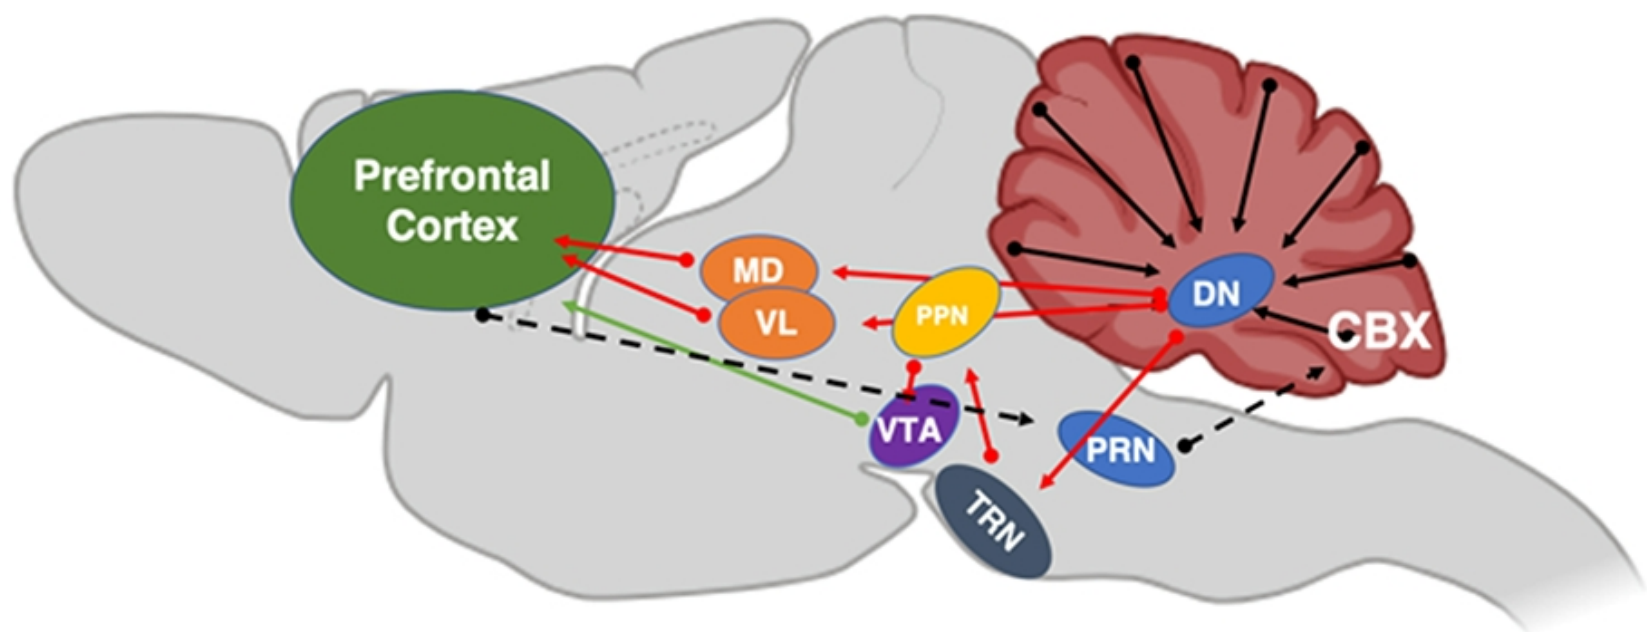

**Table 1. Internal Granule Cell Layer Area**

| Lobule | Wild-Type     | <i>Ptch1</i> <sup>+/-</sup> | Wild-Type     | <i>Ptch1</i> <sup>+/-</sup> |
|--------|---------------|-----------------------------|---------------|-----------------------------|
|        | Female        |                             | Male          |                             |
| II     | 0.342 ± 0.035 | 0.427 ± 0.033               | 0.369 ± 0.028 | 0.377 ± 0.044               |
| III    | 0.450 ± 0.027 | 0.580 ± 0.055               | 0.492 ± 0.017 | 0.556 ± 0.037               |
| IV/V   | 0.732 ± 0.029 | <b>0.897 ± 0.040*</b>       | 0.690 ± 0.029 | <b>0.941 ± 0.062*</b>       |
| VI     | 0.570 ± 0.031 | 0.569 ± 0.031               | 0.468 ± 0.034 | <b>0.616 ± 0.046*</b>       |
| VII    | 0.193 ± 0.015 | <b>0.227 ± 0.018*</b>       | 0.156 ± 0.007 | <b>0.222 ± 0.017*</b>       |
| VIII   | 0.421 ± 0.032 | <b>0.453 ± 0.028*</b>       | 0.371 ± 0.015 | <b>0.424 ± 0.024*</b>       |
| IX     | 0.637 ± 0.031 | <b>0.803 ± 0.051*</b>       | 0.765 ± 0.045 | <b>0.861 ± 0.061*</b>       |
| X      | 0.246 ± 0.015 | 0.280 ± 0.019               | 0.303 ± 0.019 | 0.316 ± 0.028               |

Measurements expressed as mean ± SEM (mm<sup>2</sup>). \* = p < .05.
